# Supplementary material for: An efficient surface energy–mass balance model for snow and ice
Source: Copernicus journal article supplement (doi:10.5194/tc-13-1529-2019), 2019-05-28
Supplement: Supplementary file [file tc-13-1529-2019-supplement-title-page.pdf › tc-13-1529-2019-supplement-title-page.pdf]

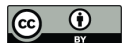

## *Supplement of*

# **An efficient surface energy–mass balance model for snow and ice**

**Andreas Born et al.**

*Correspondence to:* Andreas Born ([andreas.born@uib.no](mailto:andreas.born@uib.no))

- [tc-13-1529-2019-supplement-title-page.pdf](#)
- [IceBern2D.f90](#)
- [io.f90](#)
- [smb\\_emb.f90](#)
- [variables.f90](#)

The copyright of individual parts of the supplement might differ from the CC BY 4.0 License.
